# Supplementary material
Source: publisher site journal article supplement (https://www.degruyter.com/publication/journal_key/PTERIDINES/downloadAsset/PTERIDINES_Article%20Processing%20Charges.pdf)
Supplement: Supplementary file 1 [file PTERIDINES_Article%20Processing%20Charges.pdf]

## Article Processing Charges

EFFECTIVE MARCH 2022

---

In order to sustain the production of our fully-refereed open access journal, each article accepted for publication in *Pteridines* is subject to an Article Processing Charge of €1500. This fee is used to cover the costs of the peer-review process, professional typesetting and copyediting, as well as online hosting, long-term preservation, distribution to libraries and content aggregators worldwide, and extensive promotion to potential readers. There is no submission fee.

Editors and reviewers are not involved in author payment process and do not discuss charges with authors. The ability to pay does not influence whether or not a manuscript is accepted for publication.

Information regarding payment of these charges will be provided following acceptance for publication. Inquiries concerning Article Processing Charges should be addressed to the Editorial Office.

Articles Processing Charges are collected via RightsLink system (provided by Copyright Clearance Center). The payment can be made in EUR, USD or GBP, and may be subject to VAT when applicable.

### Waiver Policies

If the submitting author is affiliated with an organization which has [an open access agreement](#) with De Gruyter, the article processing charges (APCs) may be covered or discounted. Moreover, all authors can apply for a discount or a waiver during the submission process. Authors are asked to contact the journal Editorial Office before, or straight after submitting their article.

### Funding Opportunities

Authors who are looking for funds to support the payment of Article Processing Charges have a number of options to consider. For details, visit [our website](#).

Editorial Office

**Managing Editor**

**Jędrzej Daszkiewicz**

De Gruyter Poland Ltd.

Bogumiła Zuga 32A

01-811 Warsaw / Poland

Tel: +48 22 701 50 15

Email: [jedrzej.daszkiewicz@degruyter.com](mailto:jedrzej.daszkiewicz@degruyter.com)
